# Supplementary material
Source: MDPI journal article supplement (https://www.mdpi.com/2073-4395/9/7/385)
Supplement: s1 [file s1]

**Table S1.** Index for relative comparison of  $\Delta$ , grain yield (GY), plant height (HT), and heading date (HD) between environments.

| Standard Deviations from Mean | Rating |
|-------------------------------|--------|
| Less than -2                  | 1      |
| Between -2 and -1.5           | 2      |
| Between -1.5 and -1           | 3      |
| Between -1 and -0.5           | 4      |
| Between -0.5 and Mean         | 5      |
| Between Mean and 0.5          | 6      |
| Between 0.5 and 1             | 7      |
| Between 1 and 1.5             | 8      |
| Between 1.5 and 2             | 9      |
| Greater than 2                | 10     |

**Table S2.** Monthly and total precipitation (mm) occurring over the growing season for each location-year.

| Year | Location  | Sep. | Oct. | Nov. | Dec.  | Jan. | Feb. | March | April | May  | June | July | Total |
|------|-----------|------|------|------|-------|------|------|-------|-------|------|------|------|-------|
| 2015 | Pullman   |      | 25.9 | 65.5 | 77.5  | 47.2 | 54.1 | 59.9  | 10.2  | 34.3 | 4.8  | 4.8  | 384.3 |
| 2016 | Pullman   |      | 38.9 | 49.8 | 106.2 | 68.3 | 31.5 | 82.3  | 36.8  | 16.8 | 18.5 | 13.7 | 462.8 |
| 2017 | Pullman   |      |      | 39.4 | 29.7  | 23.1 | 65.8 | 121.2 | 36.6  | 39.6 | 20.8 | 0.5  | 376.7 |
| 2017 | Lind      | 8.9  | 86.9 | 25.1 | 6.6   | 19.8 | 52.3 | 45.5  | 25.1  | 10.4 | 13.5 | 0.0  | 294.1 |
| 2017 | Pendleton |      | 44.2 | 12.4 | 32.8  | 39.6 | 45.0 | 36.1  | 25.9  | 9.4  | 17.8 | 1.5  | 264.7 |

**Table S3.** Average maximum temperature (°C) per month during the growing season for each location-year and average maximum temperature (°C) over the entire growing season for each location-year.

| Year | Location  | Sep. | Oct. | Nov. | Dec. | Jan. | Feb. | March | April | May  | June | July | Average |
|------|-----------|------|------|------|------|------|------|-------|-------|------|------|------|---------|
| 2015 | Pullman   |      | 17.6 | 6.4  | 4.3  | 4.3  | 8.8  | 12.6  | 14.2  | 20.5 | 27.3 | 29.5 | 14.6    |
| 2016 | Pullman   |      | 18.7 | 5.1  | 2.4  | 3.5  | 8.7  | 10.0  | 17.4  | 19.2 | 23.4 | 25.8 | 13.4    |
| 2017 | Pullman   |      |      | 10.6 | -0.7 | -2.0 | 4.0  | 9.2   | 12.2  | 18.8 | 22.9 | 30.1 | 11.7    |
| 2017 | Lind      | 23.2 | 15.3 | 12.4 | -0.4 | -2.9 | 3.1  | 10.7  | 15.0  | 21.6 | 26.1 | 32.3 | 14.2    |
| 2017 | Pendleton |      | 17.9 | 14.3 | 2.9  | -2.0 | 4.3  | 14.1  | 17.4  | 24.3 | 28.4 | 34.7 | 15.6    |
